# Supplementary material
Source: Springer Nature journal article supplement (https://www.springermedizin.de/resource/supplementary/12967_2013_1738_MOESM4_ESM.pdf/9575194)

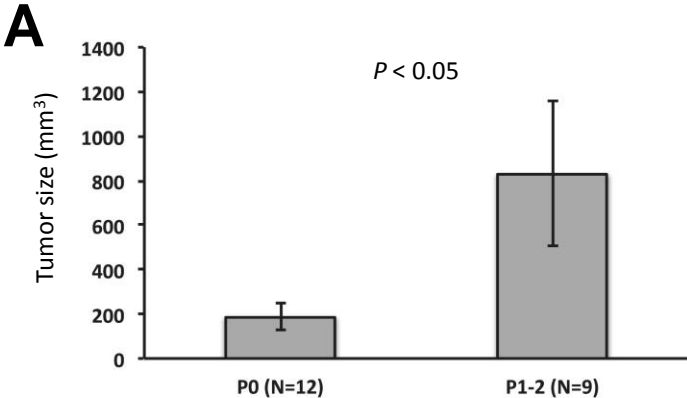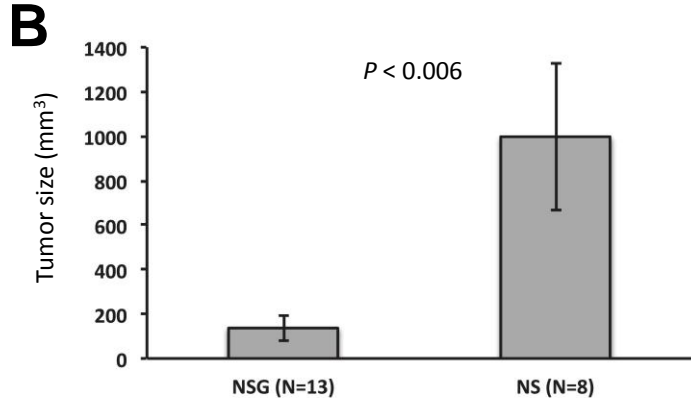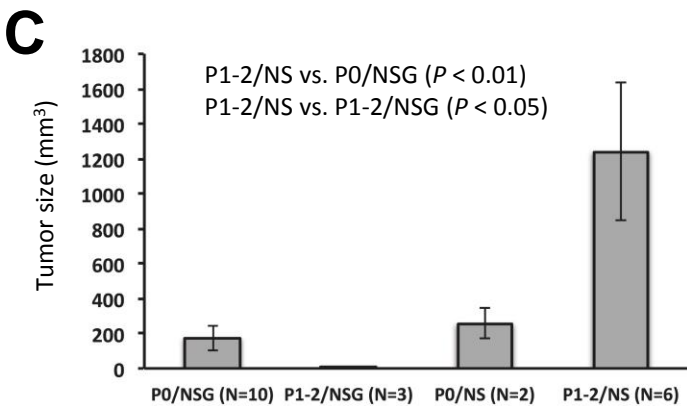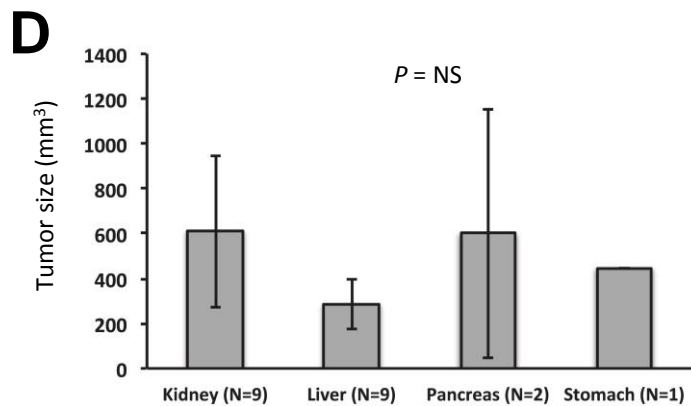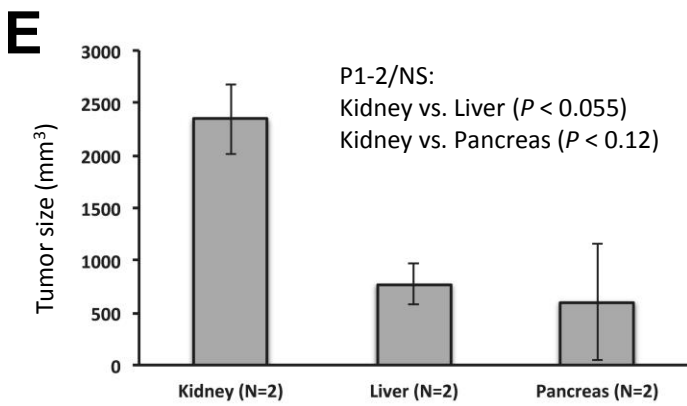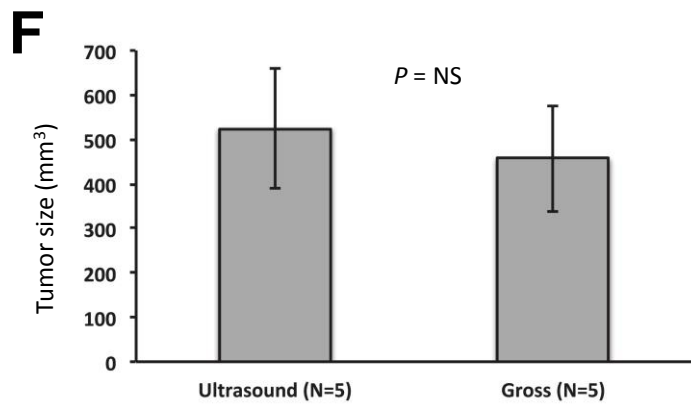

Supplement: MOESM4 [file 9575194]
